# Supplementary material for: Lethal Disease in Dogs Naturally Infected with Severe Fever with Thrombocytopenia Syndrome Virus
Source: MDPI journal article supplement (doi:10.3390/v14091963), 2022-09-04
Supplement: s1 [file s1]

**Supplementary Table S1.** SFTSV strains to which isolates in this study showed highest homology

| Strains | Prefecture | Segment | DDBJ accession number | Most closely related strains | The highest identities | Country (Prefecture) | Host          |
|---------|------------|---------|-----------------------|------------------------------|------------------------|----------------------|---------------|
| Ydog34  | Saga       | S       | LC570784.1            | KAGWH2                       | 1692/1697 (99.71%)     | South Korea          | Human         |
|         |            | M       | LC570785.1            | KAICH                        | 3318/3333 (99.55%)     | South Korea          | Human         |
|         |            | L       | LC570786.1            | ZJ2014-02                    | 6313/6324 (99.83%)     | China                | Human         |
|         |            | All     |                       | ZJ2014-02                    | 11316/11354 (99.67%)   | China                | Human         |
| Ydog39  | Hyogo      | S       | LC570787.1            | DP01-Korea-13                | 1689/1697 (99.53%)     | South Korea          | Human         |
|         |            | M       | LC570788.1            | KAGBH                        | 3305/3333 (99.16%)     | South Korea          | Human         |
|         |            | L       | LC570789.1            | 16KS42                       | 6292/6324 (99.49%)     | South Korea          | Human         |
|         |            | All     |                       | 16KS42                       | 11280/11354 (99.35%)   | South Korea          | Human         |
| Ydog59  | Yamaguchi  | S       | LC570790.1            | SPL120A                      | 1697/1697 (100%)       | Japan (Ehime)        | Human         |
|         |            | M       | LC570791.1            | KS7                          | 3325/3333 (99.76%)     | South Korea          | Human         |
|         |            | L       | LC570792.1            | SPL120A                      | 6314/6324 (99.84%)     | Japan (Ehime)        | Human         |
|         |            | All     |                       | SPL120A                      | 11333/11354 (99.82%)   | Japan (Ehime)        | Human         |
| Ydog63  | Yamaguchi  | S       | LC570793.1            | SPL055A                      | 1697/1697 (100%)       | Japan (Yamaguchi)    | Human         |
|         |            | M       | LC570794.1            | SPL075A                      | 3330/3333 (99.91%)     | Japan (Kochi)        | Human         |
|         |            | L       | LC570795.1            | SPL055A                      | 6318/6324 (99.91%)     | Japan (Yamaguchi)    | Human         |
|         |            | All     |                       | SPL055A                      | 11344/11354 (99.91%)   | Japan (Yamaguchi)    | Human         |
| Ydog70  | Wakayama   | S       | LC570796.1            | SPL161A                      | 1693/1697 (99.76%)     | Japan (Wakayama)     | Human         |
|         |            | M       | LC570797.1            | KUVL-87                      | 3290/3317 (99.19%)     | Japan (Wakayama)     | Cat           |
|         |            | L       | LC570798.1            | SPL161A                      | 6298/6324 (99.59%)     | Japan (Wakayama)     | Human         |
|         |            | All     |                       | JS-2014-18                   | 10945/11354 (96.40%)   | China                | Human         |
| N100    | Oita       | S       | LC570799.1            | A17, SPL053A                 | 1697/1697 (100%)       | Japan                | Cat and human |
|         |            | M       | LC570800.1            | SPL075A                      | 3323/3333 (99.70%)     | Japan (Kochi)        | Human         |
|         |            | L       | LC570801.1            | SPL124A                      | 6310/6324 (99.78%)     | Japan (Miyazaki)     | Human         |
|         |            | All     |                       | SPL124A                      | 11326/11354 (99.75%)   | Japan (Miyazaki)     | Human         |
